# Supplementary material
Source: publisher figshare collection journal article supplement (https://acs.figshare.com/ndownloader/files/24031348)
Supplement: Supplementary file 1 [file 24031348]

# Deposition Temperature Mediated Selective Phase Transition Mechanism of VO<sub>2</sub> Films

Dooyong Lee<sup>1,2,\*†</sup>, Donghyuk Yang<sup>1,\*</sup>, Hyegyeong Kim<sup>1</sup>, Jiwoong Kim<sup>1</sup>, Sehwan Song<sup>1</sup>,  
Kyoung Soon Choi<sup>2</sup>, Jong-Seong Bae<sup>3</sup>, Jouhahn Lee<sup>2</sup>, Jaekwang Lee<sup>1</sup>, Yunsang Lee<sup>4</sup>,  
Jiafeng Yan<sup>5</sup>, Jaeyong Kim<sup>5</sup>, and Sungkyun Park<sup>1,3,‡</sup>

<sup>1</sup>*Department of Physics, Pusan National University, Busan 46241, Korea*

<sup>2</sup>*Advanced Nano Surface Research Group, Korea Basic Science Institute, Daejeon 34133, Korea*

<sup>3</sup>*Busan Center, Korea Basic Science Institute, Busan 46742, Korea*

<sup>4</sup>*Department of Physics, Soongsil University, Seoul 06978, Korea*

<sup>5</sup>*Department of Physics, Hanyang University, Seoul, 04763, Korea*

---

\* Both of them are equally contributed.

† Current address: Department of Chemical Engineering & Materials Science, University of Minnesota,  
Minneapolis, NM, 55455, USA

‡ Correspondence should be addressed to Sungkyun Park (psk@pusan.ac.kr)

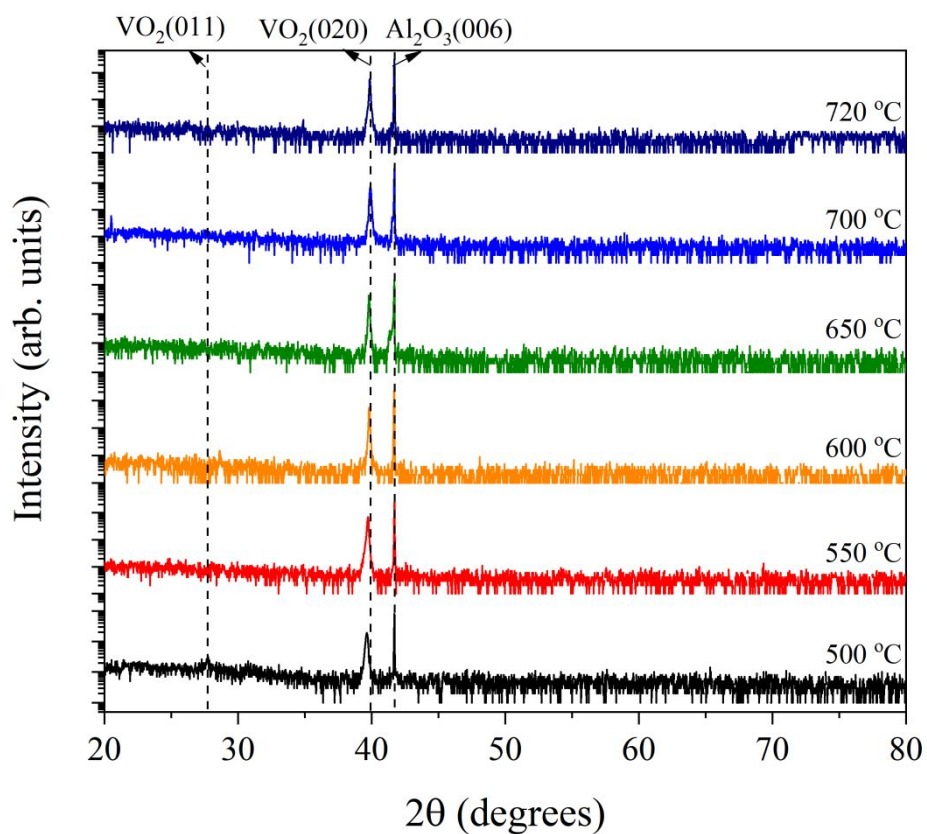

**Figure S1.** XRD  $\omega/2\theta$  full scans of  $\text{VO}_2$  films grown on  $\text{Al}_2\text{O}_3(0001)$  substrates at various deposition temperatures. The vertical dotted lines indicate the reference  $\text{Al}_2\text{O}_3(006)$  ( $2\theta = 41.66^\circ$ ) and bulk monoclinic  $\text{VO}_2(020)$  ( $2\theta = 39.88^\circ$ ).

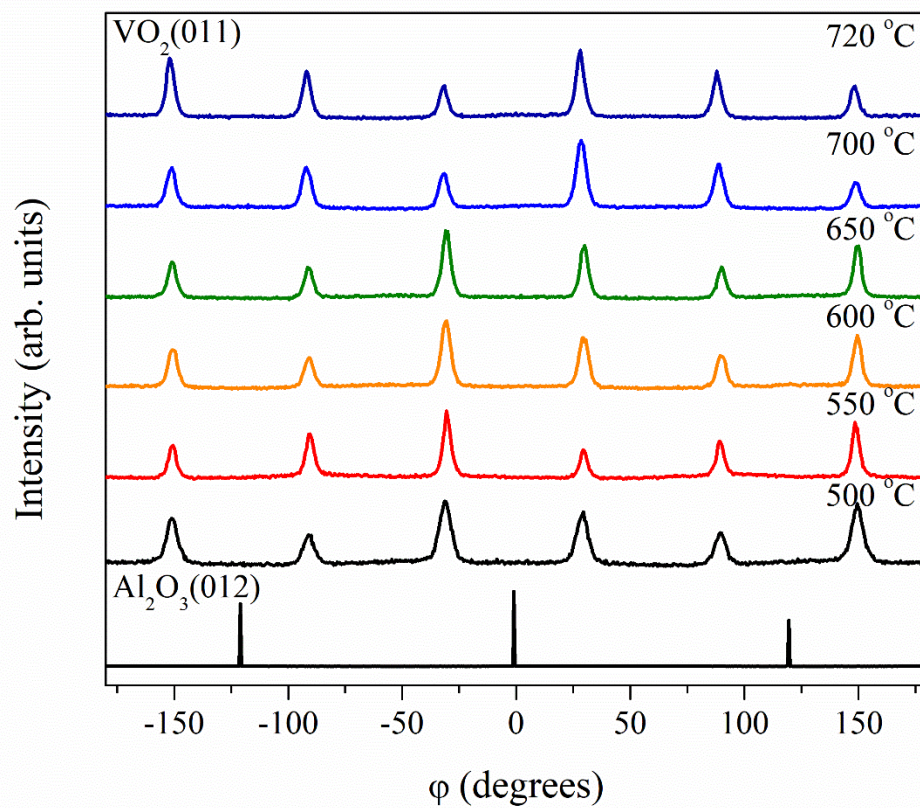

**Figure S2.**  $\phi$ -scans of (011) plane of  $\text{VO}_2$  films grown on  $\text{Al}_2\text{O}_3(0001)$  substrate at various deposition temperatures and the (012) planes of  $\text{Al}_2\text{O}_3(0001)$  substrates.

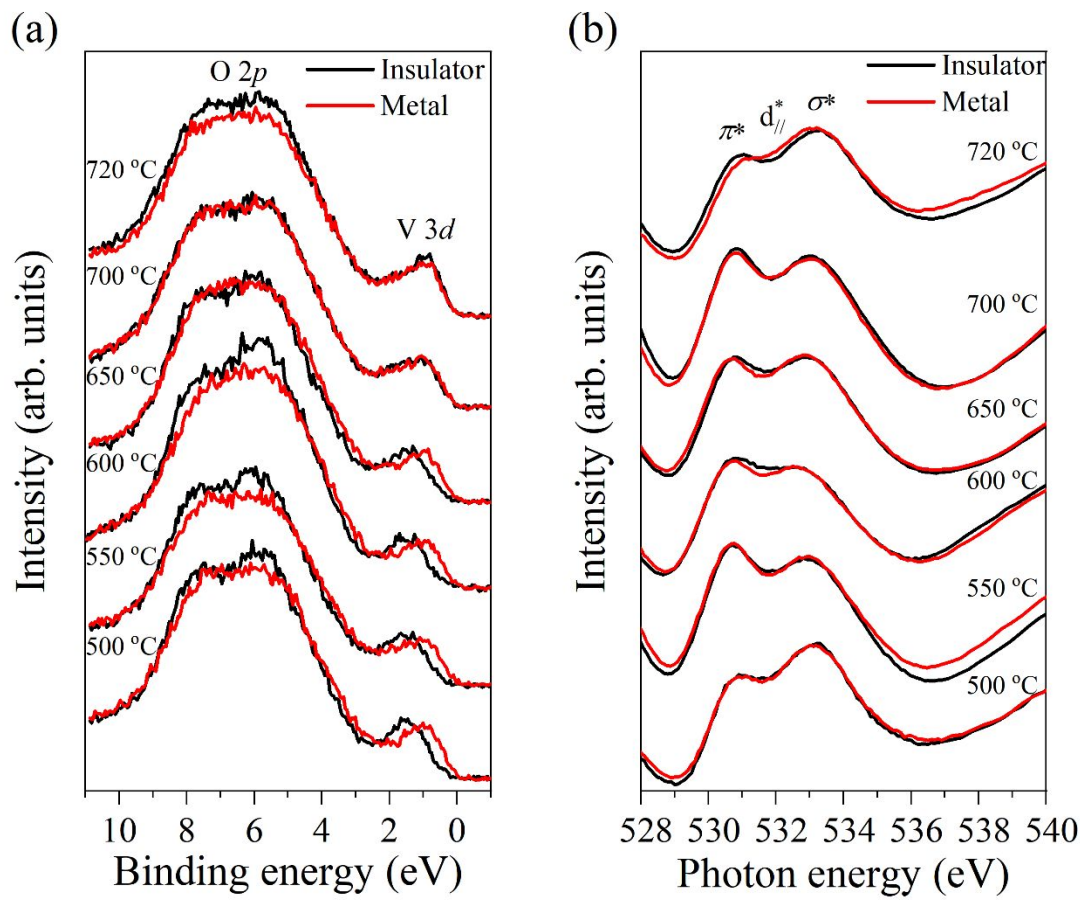

**Figure S3.** (a) Valence band spectra and (b) O *K*-edge XAS of VO<sub>2</sub> films deposited at 500, 550, 600, 650, 700, and 720 °C for the insulator (measured at RT) and metal (measured at 100 °C) phases.

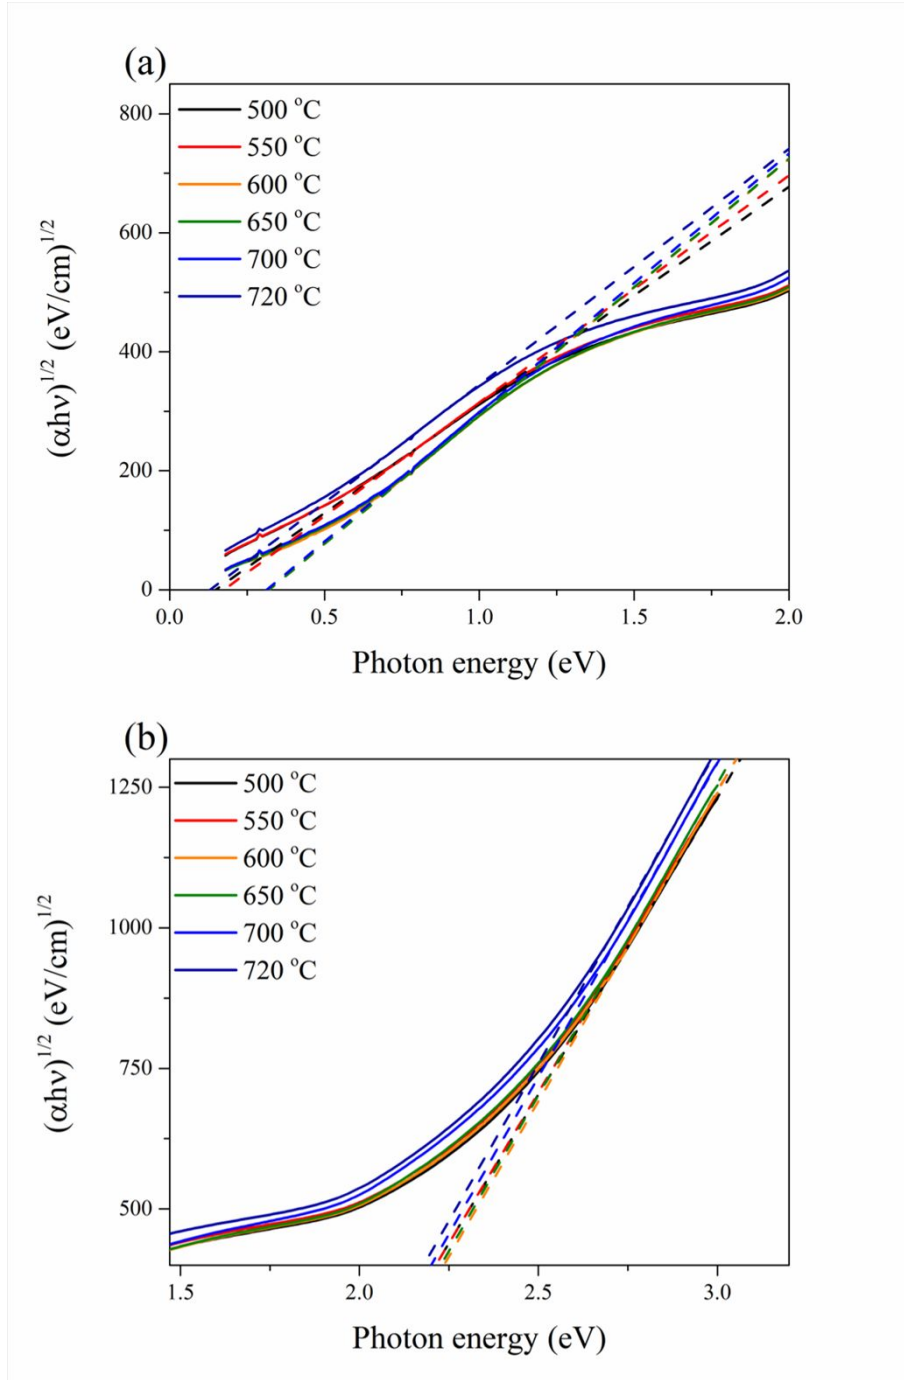

**Figure S4.** Optical absorption spectra of VO<sub>2</sub> films deposited at various temperatures in (a) low and (b) high photon energy region. Optical band-gap energy  $E_2$  ( $E_1$ ) is obtained from the absorption spectra in the low (high) photon energy region after linear extrapolation. Dashed lines represent the results of the linear fitting.

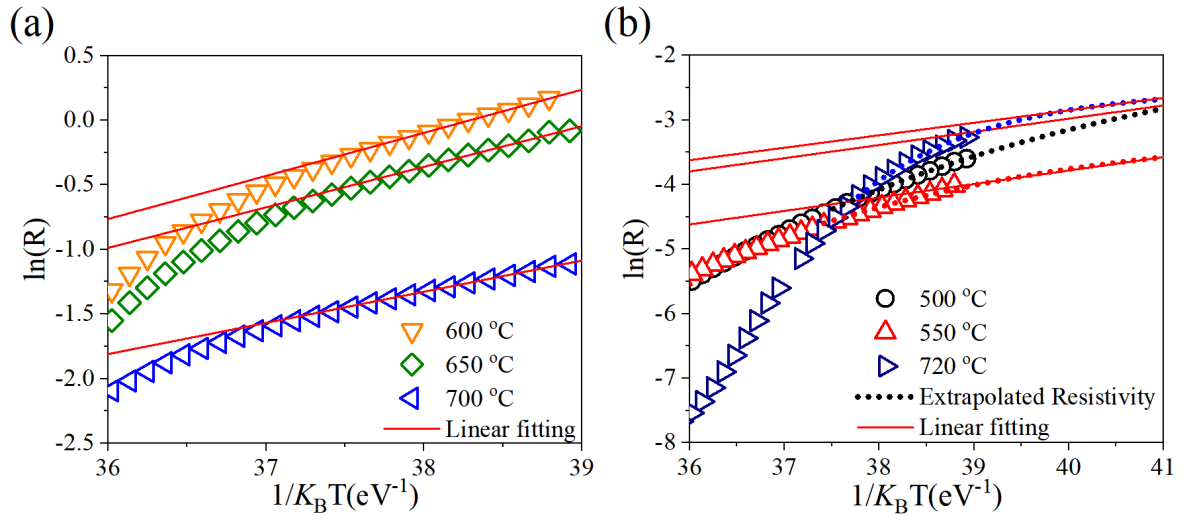

**Figure S5.** Plot of  $\ln(R)$  vs.  $1/K_B T$  of VO<sub>2</sub> films deposited at (a) 600, 650, and 700 °C and (b) 500, 550, and 720 °C. The solid curves indicate the liner fitted result to obtain the activation energy.

**Table S1.** Binding energy, FWHM and relative peak area ratio of deconvoluted V  $2p_{3/2}$  core-level photoelectron spectra of VO<sub>2</sub> films with various deposition temperatures.

| Deposition temperature (°C) | Binding energy (eV) |                 |                 | FWHM (eV)       |                 |                 | Relative peak area ratio (%) |                 |                 |
|-----------------------------|---------------------|-----------------|-----------------|-----------------|-----------------|-----------------|------------------------------|-----------------|-----------------|
|                             | V <sup>3+</sup>     | V <sup>4+</sup> | V <sup>5+</sup> | V <sup>3+</sup> | V <sup>4+</sup> | V <sup>5+</sup> | V <sup>3+</sup>              | V <sup>4+</sup> | V <sup>5+</sup> |
| 500                         | 515.20              | 516.14          | 517.43          | 1.50            | 1.31            | 1.39            | 2.54                         | 59.25           | 38.42           |
| 550                         | 515.20              | 516.16          | 517.44          | 1.50            | 1.37            | 1.47            | 2.46                         | 59.25           | 37.97           |
| 600                         | 515.20              | 516.17          | 517.47          | 1.50            | 1.37            | 1.45            | 2.64                         | 61.78           | 35.57           |
| 650                         | 515.19              | 516.18          | 517.49          | 1.50            | 1.37            | 1.39            | 3.98                         | 62.54           | 34.38           |
| 700                         | 515.20              | 516.17          | 517.43          | 1.50            | 1.23            | 1.40            | 6.78                         | 58.22           | 35.00           |
| 720                         | 515.19              | 516.19          | 517.47          | 1.50            | 1.28            | 1.42            | 8.62                         | 57.03           | 34.35           |
